# Supplementary material for: Vivianite formation in methane-rich deep-sea sediments from the South China Sea
Source: Copernicus journal article supplement (doi:10.5194/bg-2018-340), 2018-08-02
Supplement: Supplementary file 1 [file Supplementary information.xlsx]

## Sheet: Fig. 2 & 7
Depth (cmbsf)	Vivianite (wt. ‰)	Iron-rich sheet silicates (wt. ‰)	>65 μm (%)
17.5	0	0	0.16671
27.5	0	0	0.11599
37.5	0	0.0398314	0.0938
47.5	0	0	0.16708
57.5	0	0	0.15254
67.5	0	0	0.16882
77.5	0	0	0.28067
85.5	0	0.0434834	0.15116
91.5	0	0	0.10173
97.5	0	0	0.13887
103.5	0	0	0.05817
109.5	0	0.427985	0.1473
115.5	0	0	0.07931
121.5	0	0	0.0831
128	0	0	0.05548
134.5	0	0	0.06877
140.5	0	0	0.08947
146.5	0	0	0.08298
152.5	0	0	0.09032
158.5	0	0	0.19774
164.5	0	0	0.08998
170.5	0	0	0.20476
176.5	0	0	0.1341
181.5	0	0	0.09238
187.5	0	0	0.15827
193.5	0	0	0.17103
199.5	0	0	0.16587
205.5	0	0	0.09809
211.5	0	0	0.09559
217.5	0	0	0.18055
223.5	0	0	0.1637
229	0	0	0.23278
234.5	0	0	0.18758
240.5	0	0	0.10517
246.5	0	0	0.13399
252.5	0	0	0.17066
258.5	0	0	0.08604
264.5	0	0	0.04908
270.5	0	0	0.08996
276.5	0	0	0.14342
281.5	0	0	0.06192
287.5	0	0	0.14825
293.5	0	0.0324646	0.1381
299.5	0	0	0.13043
305.5	0	0	0.11187
311.5	0	0	0.12582
317.5	0	0	0.08693
323.5	0	0	0.12514
329	0	0	0.2259
334.5	0	0	0.05913
340.5	0	0	0.20825
346.5	0	0	0.13182
352.5	0	0	0.08869
358.5	0	0	0.05797
364.5	0	0	0.06088
370.5	0	0	0.072
376.5	0	0	0.02864
381.5	0	0	0.10291
387.5	0	0	0.07151
393.5	0	0	0.03376
399.5	0	0	0.0478
405.5	0	0	0.04865
411.5	0	0	0.02488
417.5	0	0	0.0633
423.5	0	0	0.10051
445	0	0	0.09917
454.5	0	8.48474	7.01901
460.5	0	8.42684	7.05776
466.5	0	6.14045	3.84494
472.5	0	0.696065	2.23389
478.5	0	0.528157	2.05117
484.5	0	2.11861	3.24822
487.5	0	0.466995	2.88159
490.5	0	2.49142	2.71401
493.5	0	1.90303	3.55743
496.5	0	0.278269	2.81175
499.5	0	0.973429	1.79308
502.5	0	0.362088	1.60725
505.5	0	2.41537	2.40779
508.5	0	0.868636	2.23456
511.5	0	1.42134	3.32922
514.5	0	2.2631	2.78335
517.5	0	0.236741	1.97258
520.5	0	0.839442	2.10498
523.5	0	0.138658	2.07743
526.5	0	0.460524	2.23092
529	0	0.507427	2.53779
531.5	0	0.475927	4.24386
534.5	0	0.596228	3.31652
537.5	0	0.258826	2.15944
540.5	0	0.208278	2.07586
543.5	0	0.373736	2.26182
546.5	0	0.0838469	2.8837
549.5	0	0.083261	3.30903
552.5	0	0.915175	4.39744
555.5	0	0.726151	4.74442
558.5	0	0.0718086	4.46294
561.5	0	0.292051	3.77026
564.5	0	0.630292	3.2785
567.5	0	1.39939	2.70954
570.5	0	1.13212	2.17033
573.5	0	0.855664	2.25722
576.5	0	2.89799	2.59386
579	0	1.64085	3.48221
581.5	0	1.67888	3.25494
584.5	0	2.38003	3.59241
587.5	0	1.06431	3.38077
590.5	0	1.45182	2.80506
593.5	0	0.940461	3.37627
596.5	0	0.658623	3.19682
599.5	0	4.16286	2.39342
602.5	0	4.23919	2.45513
605.5	0	0.89863	0.51199
608.5	0	0	0.08164
611.5	0	0.101648	0.09994
617.5	0	0	0.07327
623.5	0	0.0438876	0.11066
629	0	0.110077	0.30807
634.5	0	0	0.04505
640.5	0	0	0.06615
646.5	0	0.480924	0.10773
652.5	0	0.0392938	0.039
658.5	0	0.0680172	0.06242
664.5	0	0	0.02376
670.5	0	0.126101	0.12705
676.5	0	0.0857353	0.08599
681.5	0	0	0.07091
687.5	0	0	0.03854
693.5	0	0.0814593	0.12084
699.5	0	0.0535014	0.12603
705.5	0	0.0992131	0.23008
711.5	0	0.108019	0.17754
717.5	0	0.0378618	0.07348
723.5	0	0	0.08433
729	0	0.0408493	0.18138
734.5	0	0	0.04641
740.5	0	0.038738	0.0438
746.5	0	0.16274	0.02977
752.5	0	0	0.01292
758.5	0	0.0325094	0.05247
764.5	0	0.0713181	0.11434
770.5	0	0.139252	0.11036
776.5	0	0	0.03316
782.5	0	0.07736	0.31709
792.5	0	0	0.12043
802.5	0	0.0395565	0.14824
812.5	0	0	0.10866
819.5	0	0	0.06136
825.5	0	0.00562047	0.07303
831.5	0	0.124185	0.06863
837.5	0	0.0972023	0.13185
846	0	0.102464	0.23421
859.5	0	0	0.04009
868.5	0	0	0.102
878	0	0	0.16495
884.5	0	0.0211707	0.15472
890.5	0	0.0618808	0.11679
896.5	0	0.0523264	0.13041
902.5	0	0.0220724	0.17876
908.5	0	0	0.04098
914.5	0.0224857	0.0337285	0.03167
920	0.644843	0.442979	0.06128
925.5	0.161084	0.860968	0.03898
931.5	0.431368	0	0.12004
937.5	0.109101	0.0818255	0.06733
943.5	1.58475	0	0.10059
949.5	0.091954	1.48749	0.0901
955.5	0.138863	0.0160226	0.04726
961.5	0.20917	0.33789	0.04542
968	0.100523	0	0.0334
974.5	0.117223	0	0.01284
980.5	0.120455	0.0209488	0.01866
986.5	0.0704367	0.260074	0.02048
992.5	0.7252	0.00510704	0.02665
998.5	0.201027	0	0.01545
1004.5	0.0255184	0.102074	0.01672
1010.5	0.0488563	0.07817	0.01337
1016.5	0.158744	0.19971	0.01714
1021.5	0.0148725	0	0.13078
1027.5	0.109558	0.0991241	0.01958
1033.5	0.0803794	0	0.02103
1044.5	0.0878204	0.537254	0.03392
1050.5	0.0296955	0.737438	0.03523
1056.5	0.51261	0	0.03884
1062.5	0.0585189	0	0.01691
1068.5	0.0491106	0	0.0752
1075.5	0.0825155	0.201131	0.01884
1081.5	0.186502	0.19183	0.01883
1087.5	0.163584	0.854859	0.04022
1093.5	0.394544	0.741742	0.03721
1099.5	0.199837	0	0.01395
1105.5	0.681711	0.194064	0.10437
1111.5	0.896556	0.309157	0.03947
1116.5	0.173659	1.13389	0.10964
1122.5	0.231774	0.0421408	0.03566
1128.5	0.249332	0	0.01785
1134.5	0.0977648	0.0360186	0.02467
1140.5	0.103389	0.139575	0.01905
1148.5	0.554564	0.655394	0.06183
1156.5		0	0.02337
1165.5	0.0669316	0	0.01153
1174.5	0.4779	0	0.01825
1183.5	0.117117	0.259694	0.02304
1189.5	0.280453	0	0.00958
1195.5	0.12115	0	0.01075
1201.5	0.114088	0	0.01562
1207.5	0.0554357	0	0.00818
1213.5	0.356087	0	0.01582
1219.5	0.0857242	0	0.01721
1225.5	0.133786	0.0360193	0.01173
1231.5	0.14047	0	0.01071
1243.5	0.240758	0.136081	0.01924
1249.5	0.126444	0.0549756	0.01586
1256.5	0.199342	0	0.04366
1262.5	0.0280511	0.145866	0.01065
1268.5	0.291424	0	0.01221
1274.5	0.221674	0.130113	0.01584
1280.5	0.0192621	2.93747	0.07902
1286.5	0.183436	0.54548	0.02495
1292	0	0.101307	0.01111
1296.5	0.105486	0.474689	0.22003
1302.5	0.0965051	0.0643368	0.00935
1308.5	0.0835299	0	0.00996
1314.5	0.150586	0.0631488	0.00655
1320.5	0.0895825	0	0.02461
1326.5	0.104273	0.0805744	0.02091
1332.5	0.32358	0	0.01483
1338.5	0.0651126	0	0.02403
1344	0.225855	0	0.00734
1352.5	0.115406	0.0401413	0.01704
1367.5	0.248905	0.445157	0.08185

## Sheet: Fig. 8
Depth (cmbsf)	Reactive iron oxides (μmol/g)	Iron (oxy)hydroxides (μmol/g)	Reactive manganese (μmol/g)
17.5	206.432	71.3151	3.35091
106.5	159.421	69.448	2.86364
217.5	144.246	63.7877	2.88909
323.5	157.364	63.2914	3.35091
420.5	142.332	66.2073	2.73636
499.5	92.4133	49.9065	1.99455
540.5		40.5325
564.5	75.6792	34.08	1.61091
579		36.2725
626.5	109.573	58.7254	2.73636
670.5	103.404	68.3795	2.78727
731.5	102.198	66.2536	3.37636
779	108.367	73.9968	3.19636
822.5	105.957	72.6068	4.04
871.5	127.938	93.7145	4.22
899.5	238.057	173.345	3.70909
905.5		170.121
928.5	175.091	124.16	4.01455
958.5	189.272	128.126	3.98909
995.5	181.331	123.174	4.44909
1019.5	174.098	128.892	4.60364
1056.5	169.135	133.644	4.34727
1096.5	197.001	150.068	3.73455
1131.5	234.511	161.333	4.06545
1168.5	204.234	139.298	4.22
1204.5	205.794	139.594	4.01455
1246.5	219.195	159.077	4.52727
1271.5	197.639		4.04
1283.5	195.016	143.429	4.24545
1323.5	202.036	153.401	4.39818
1372.5	204.588	150.774	4.27091
